# Supplementary material
Source: publisher site journal article supplement (https://www.dovepress.com/article/480890)
Supplement: Supplementary file 1 [file get_supplementary_file.php]

**Supplemental Table 1:** Model Inputs for One-Way Sensitivity Analyses

| Model Input Parameter | Base Case Input | Reference | Lower Bound | Reference | Upper Bound | Reference |
| --- | --- | --- | --- | --- | --- | --- |
| Percent of health plan on RAS antagonists | 15.585% | Chobufo,37 Shah,39 Statehealth38 | 12.468% | -20% | 18.702% | +20% |
| Percent of health plan on statins | 26.153% | Matyori,40 Statehealth38 | 20.922% | -20% | 31.384% | +20% |
| Percent of health plan on oral antidiabetics | 4.038% | CDC,41 Fang,42 Raval,43 Statehealth38 | 3.230% | -20% | 4.846% | +20% |
| Percent of health plan on DOACs | 0.465% | Turakhia,48 Navar,49 Weller,50 Iyer,51 Statehealth38 | 0.372% | -20% | 0.558% | +20% |
| Percent of patients on RAS antagonists adherent in the pre-blister-packaging period | 68.4% | Campbell JAHA7 | 54.720% | -20% | 82.080% | +20% |
| Percent of patients on statins adherent in the pre-blister-packaging period | 61.9% | Chinthammit JCL8 | 49.520% | -20% | 74.280% | +20% |
| Percent of patients on oral antidiabetics adherent in the pre-blister-pack period | 65.2% | Chinthammit JMCP9 | 52.160% | -20% | 78.240% | +20% |
| Percent of patients on DOACs adherent in the pre-blister-packaging period | 54.4% | Deshpande JMCP10 | 43.520% | -20% | 65.280% | +20% |
| Percent increase in adherence from blister-packaging medications | 12.0% | Zedler23 | 5.0% | Zedler23 | 21.0% | Zedler23 |
| Impact on total monthly healthcare costs from patients on RAS antagonists | -$123.99 | Campbell JAHA7 | $99.19 | -20% | -$148.79 | +20% |
| Impact on total monthly healthcare costs from patients on statins | -$23.93 | Chinthammit JCL8 | -$19.14 | -20% | -$28.72 | +20% |
| Impact on total monthly healthcare costs from patients on oral antidiabetics | -$39.00 | Chinthammit JMCP9 | -$31.20 | -20% | -$46.80 | +20% |
| Impact on total monthly healthcare costs from patients on DOACs | $395.92 | Deshpande JMCP10 | -$316.74 | -20% | -$475.10 | +20% |

DOACs: Direct Oral Anticoagulants; RAS: Renin-Angiotensin-System
